# Supplementary material for: Lipidomic Signatures Align with Inflammatory Patterns and Outcomes in Critical Illness
Source: Res Sq. 2021 Jan 8:rs.3.rs-106579. Preprint. [Version 1] doi: 10.21203/rs.3.rs-106579/v1 (PMC7805459; doi:10.21203/rs.3.rs-106579/v1)
Supplement: Supplement [file fdbd122b595132357303b3a5.xlsx]

## Sheet: Table S1
Table S1 Comorbility and meditation for patients invovled in lipidomics measurement
	Resolving	Non-resolving	Early-Nonsurvivors	p-value
	(N=41)	(N=101)	(N=51)
Smoker
Yes	15 (39.5%)	36 (41.9%)	8 (38.1%)	0.937
No	23 (60.5%)	50 (58.1%)	13 (61.9%)
Missing	3 (7.3%)	15 (14.9%)	30 (58.8%)
Alcoholism
Yes	7 (18.4%)	11 (12.9%)	2 (9.52%)	0.591
No	31 (81.6%)	74 (87.1%)	19 (90.5%)
Missing	3 (7.3%)	16 (15.8%)	30 (58.8%)
Hypertension
Yes	10 (25.6%)	34 (39.1%)	9 (37.5%)	0.335
No	29 (74.4%)	53 (60.9%)	15 (62.5%)
Missing	2 (4.9%)	14 (13.9%)	27 (52.9%)
Diabetes
Yes	6 (15.0%)	10 (11.5%)	5 (20.8%)	0.491
No	34 (85.0%)	77 (88.5%)	19 (79.2%)
Missing	1 (2.4%)	14 (13.9%)	27 (52.9%)
Arrhythmia
Yes	1 (2.56%)	5 (5.95%)	1 (4.76%)	0.718
No	38 (97.4%)	79 (94.0%)	20 (95.2%)
Missing	2 (4.9%)	17 (16.8%)	30 (58.8%)
History MI
Yes	0 (0%)	3 (3.49%)	4 (17.4%)	0.00548
No	39 (100%)	83 (96.5%)	19 (82.6%)
Missing	2 (4.9%)	15 (14.9%)	28 (54.9%)
Congestive HF
Yes	0 (0%)	4 (4.65%)	2 (9.09%)	0.202
No	40 (100%)	82 (95.3%)	20 (90.9%)
Missing	1 (2.4%)	15 (14.9%)	29 (56.9%)
COPD
Yes	1 (2.50%)	5 (5.68%)	2 (8.33%)	0.578
No	39 (97.5%)	83 (94.3%)	22 (91.7%)
Missing	1 (2.4%)	13 (12.9%)	27 (52.9%)
Liver disease
Yes	1 (2.50%)	2 (2.30%)	3 (14.3%)	0.0371
No	39 (97.5%)	85 (97.7%)	18 (85.7%)
Missing	1 (2.4%)	14 (13.9%)	30 (58.8%)
Renal dysfunction
Yes	1 (2.50%)	4 (4.60%)	2 (9.09%)	0.501
No	39 (97.5%)	83 (95.4%)	20 (90.9%)
Missing	1 (2.4%)	14 (13.9%)	29 (56.9%)
Coagulopathy
Yes	0 (0%)	1 (1.19%)	0 (0%)	0.698
No	40 (100%)	83 (98.8%)	20 (100%)
Missing	1 (2.4%)	17 (16.8%)	31 (60.8%)
Antihypertensive
Yes	8 (19.5%)	26 (31.0%)	2 (10.5%)	0.113
No	33 (80.5%)	58 (69.0%)	17 (89.5%)
Missing	0 (0%)	17 (16.8%)	32 (62.7%)
Statins
Yes	2 (4.88%)	12 (14.3%)	1 (5.26%)	0.198
No	39 (95.1%)	72 (85.7%)	18 (94.7%)
Missing	0 (0%)	17 (16.8%)	32 (62.7%)
Betablockers
Yes	3 (7.32%)	7 (8.54%)	0 (0%)	0.441
No	38 (92.7%)	75 (91.5%)	18 (100%)
Missing	0 (0%)	19 (18.8%)	33 (64.7%)
Corticosteriods
Yes	0 (0%)	2 (2.44%)	1 (5.26%)	0.399
No	41 (100%)	80 (97.6%)	18 (94.7%)
Missing	0 (0%)	19 (18.8%)	32 (62.7%)
Anticoagulants
Yes	1 (2.44%)	3 (3.61%)	2 (10.5%)	0.32
No	40 (97.6%)	80 (96.4%)	17 (89.5%)
Missing	0 (0%)	18 (17.8%)	32 (62.7%)
NSAID
Yes	4 (9.76%)	5 (6.10%)	1 (5.26%)	0.717
No	37 (90.2%)	77 (93.9%)	18 (94.7%)
Missing	0 (0%)	19 (18.8%)	32 (62.7%)
ASA
Yes	4 (9.76%)	5 (5.95%)	4 (19.0%)	0.165
No	37 (90.2%)	79 (94.0%)	17 (81.0%)
Missing	0 (0%)	17 (16.8%)	30 (58.8%)
Other antiplatelet
Yes	0 (0%)	4 (4.76%)	1 (5.00%)	0.36
No	41 (100%)	80 (95.2%)	19 (95.0%)
Missing	0 (0%)	17 (16.8%)	31 (60.8%)
Oral contraceptives
Yes	1 (2.50%)	1 (1.20%)	0 (0%)	0.7
No	39 (97.5%)	82 (98.8%)	23 (100%)
Missing	1 (2.4%)	18 (17.8%)	28 (54.9%)
MI: Myocardial Infarction；HF: Heart Failure; COPD: Chronic obstructive pulmonary disease;
NSAID: Non-steroidal anti-inflammatory medications; ASA: Acetylsalicylic acid.
Percerntage of comorbidity or drug usage is calculated only in observed data and exculde missing data.

## Sheet: Table S2
Table S2 Statistics results for 29 common species among 4 datatsets from trauma or Covid-19 patients
PAMPer(Non-resolving/resovling at 72h)					TD-2(Non-resolving/resovling at D2-D5)					Guo et al(Severe/Non-severe Covid-19)					Shui et al(Severe/Mild Covid-19)
Species	p_val	avg_log2FC	p_val_adj		Species	p_val	avg_log2FC	p_val_adj		Species	p_val	avg_log2FC	p_val_adj		Species	p_val	avg_log2FC	p_val_adj
PE(16:0/18:2)	0.137856	0.780116	1		PE(16:0/18:2)	0.137856	0.780116	1		PE(16:0/18:2)	0.00133084	1.08232	0.0385942		PE(16:0/18:2)	0.00208885	0.654275	0.0605767
PE(18:0/18:1)	0.0148466	1.14902	0.430551		PE(18:0/18:1)	0.0148466	1.14902	0.430551		PE(18:0/18:1)	0.0144909	0.446783	0.420237		PE(18:0/18:1)	0.0233776	0.486112	0.67795
PE(18:1/18:2)	0.013054	1.17901	0.378565		PE(18:1/18:2)	0.013054	1.17901	0.378565		PE(18:1/18:2)	0.191692	0.165346	1		PE(18:1/18:2)	0.953857	0.275303	1
PE(18:0/18:2)	0.0433799	0.849557	1		PE(18:0/18:2)	0.0433799	0.849557	1		PE(18:0/18:2)	0.0123789	0.388564	0.358987		PE(18:0/18:2)	0.0633253	0.519674	1
PE(16:0/20:4)	0.269256	0.609346	1		PE(16:0/20:4)	0.269256	0.609346	1		PE(16:0/20:4)	0.0008891	0.768609	0.0257839		PE(16:0/20:4)	0.000665428	0.525256	0.0192974
PE(16:0/22:6)	0.247832	0.444781	1		PE(16:0/22:6)	0.247832	0.444781	1		PE(16:0/22:6)	2.04463e-05	1.32309	0.000592944		PE(16:0/22:6)	8.36943e-06	0.863381	0.000242713
PE(18:0/20:4)	0.206969	0.244403	1		PE(18:0/20:4)	0.206969	0.244403	1		PE(18:0/20:4)	0.0432298	0.445403	1		PE(18:0/20:4)	0.0663785	0.355219	1
PE(18:0/22:6)	0.251565	0.87188	1		PE(18:0/22:6)	0.251565	0.87188	1		PE(18:0/22:6)	0.000867893	1.19186	0.0251689		PE(18:0/22:6)	6.54068e-06	0.954327	0.00018968
PC(16:0/16:1)	0.0100317	0.481782	0.29092		PC(16:0/16:1)	0.0100317	0.481782	0.29092		PC(16:0/16:1)	0.0346137	0.741556	1		PC(16:0/16:1)	0.280869	0.103633	1
PC(16:0/18:2)	0.215406	-0.0632339	1		PC(16:0/18:2)	0.215406	-0.0632339	1		PC(16:0/18:2)	0.0077898	0.300999	0.225904		PC(16:0/18:2)	0.724506	0.032211	1
PC(16:0/18:1)	0.265267	0.0894952	1		PC(16:0/18:1)	0.265267	0.0894952	1		PC(16:0/18:1)	0.00168532	0.45305	0.0488744		PC(16:0/18:1)	0.128451	0.138213	1
PC(16:0/20:4)	0.0830178	-0.182299	1		PC(16:0/20:4)	0.0830178	-0.182299	1		PC(16:0/20:4)	0.258198	-0.206276	1		PC(16:0/20:4)	0.693193	0.106882	1
PC(18:2/18:2)	0.633991	0.313307	1		PC(18:2/18:2)	0.633991	0.313307	1		PC(18:2/18:2)	0.221698	-0.769619	1		PC(18:2/18:2)	0.000775602	-0.792035	0.0224924
PC(16:0/20:3)	0.607883	-0.0250153	1		PC(16:0/20:3)	0.607883	-0.0250153	1		PC(16:0/20:3)	0.881971	-0.0278936	1		PC(16:0/20:3)	1	0.216691	1
PC(18:1/18:2)	1	6.66134e-16	1		PC(18:1/18:2)	1	6.66134e-16	1		PC(18:1/18:2)	0.277932	-0.417871	1		PC(18:1/18:2)	0.034013	-0.241517	0.986377
PC(18:0/18:2)	0.306981	0.0488903	1		PC(18:0/18:2)	0.306981	0.0488903	1		PC(18:0/18:2)	0.529909	0.0525056	1		PC(18:0/18:2)	0.903701	0.0785189	1
PC(18:0/18:1)	0.0611909	0.256006	1		PC(18:0/18:1)	0.0611909	0.256006	1		PC(18:0/18:1)	0.288174	0.133691	1		PC(18:0/18:1)	0.531328	0.180716	1
PC(18:0/22:6)	0.0880634	-0.381103	1		PC(18:0/22:6)	0.0880634	-0.381103	1		PC(18:0/22:6)	0.174123	0.311871	1		PC(18:0/22:6)	0.216392	0.132766	1
PC(18:2/20:4)	0.102732	0.277504	1		PC(18:2/20:4)	0.102732	0.277504	1		PC(18:2/20:4)	0.0259435	-0.83759	0.752361		PC(18:2/20:4)	0.000256244	-0.676319	0.00743107
PC(18:0/20:4)	0.227635	-0.148583	1		PC(18:0/20:4)	0.227635	-0.148583	1		PC(18:0/20:4)	0.0508246	-0.474802	1		PC(18:0/20:4)	0.829242	0.160362	1
PC(18:1/22:6)	0.3203	0.206227	1		PC(18:1/22:6)	0.3203	0.206227	1		PC(18:1/22:6)	0.881971	-0.0496949	1		PC(18:1/22:6)	0.04975	-0.198389	1
PI(18:0/18:2)	0.611117	0.0140994	1		PI(18:0/18:2)	0.611117	0.0140994	1		PI(18:0/18:2)	0.107325	0.516441	1		PI(18:0/18:2)	8.78965e-06	0.614609	0.0002549
PI(18:0/20:4)	0.429266	-0.111497	1		PI(18:0/20:4)	0.429266	-0.111497	1		PI(18:0/20:4)	0.0077898	-0.524078	0.225904		PI(18:0/20:4)	0.0124663	-0.256195	0.361523
SM(14:0)	0.0516459	-0.45568	1		SM(14:0)	0.0516459	-0.45568	1		SM(14:0)	0.160093	0.278249	1		SM(14:0)	0.0603891	0.209443	1
SM(18:1)	3.81071e-05	-0.665981	0.00110511		SM(18:1)	3.81071e-05	-0.665981	0.00110511		SM(18:1)	0.607297	0.0919199	1		SM(18:1)	0.0104135	0.378549	0.301993
SM(20:1)	8.04707e-05	-0.632093	0.00233365		SM(20:1)	8.04707e-05	-0.632093	0.00233365		SM(20:1)	0.639604	-0.0800967	1		SM(20:1)	0.639663	0.0604801	1
SM(20:0)	0.000483041	-0.623777	0.0140082		SM(20:0)	0.000483041	-0.623777	0.0140082		SM(20:0)	0.544978	0.162381	1		SM(20:0)	0.0745447	0.1725	1
SM(22:1)	0.00061418	-0.524148	0.0178112		SM(22:1)	0.00061418	-0.524148	0.0178112		SM(22:1)	0.457874	0.160874	1		SM(22:1)	0.545219	-0.0738835	1
SM(24:1)	0.0100314	-0.65859	0.290911		SM(24:1)	0.0100314	-0.65859	0.290911		SM(24:1)	0.0766897	0.395581	1		SM(24:1)	0.0407295	0.325496	1
Statistic analysis was conducted by using Wilcoxon Rank Sum test between 2 groups. Adjusted p-value was calcutaled based on bonferroni correction.

## Sheet: Table S3
Table S3 Ranking of lipid species between non-resolving and resovling trauma patients at 72h
Species	p_val	avg_logFC	p_val_adj	FC	class	Ranking
TAG46:4-FA18:2	2.81918e-08	2.54206	2.81072e-05	5.82419	TAG	1
TAG54:8-FA18:2	4.54088e-08	1.83103	4.52726e-05	3.55791	TAG	2
PE(18:0/18:1)	6.18597e-08	0.480688	6.16741e-05	1.39541	PE	3
TAG54:7-FA18:1	9.00278e-08	1.16072	8.97578e-05	2.23569	TAG	4
TAG46:3-FA18:2	9.13446e-08	1.74052	9.10705e-05	3.34156	TAG	5
PE(O-16:0/18:2)	1.47089e-07	0.444863	0.000146648	1.36118	PE	6
PE(16:0/18:1)	1.60307e-07	0.493153	0.000159826	1.40752	PE	7
TAG46:3-FA18:1	2.25361e-07	2.14385	0.000224685	4.4194	TAG	8
PE(O-16:0/18:1)	2.81404e-07	0.552637	0.00028056	1.46676	PE	9	Logistic regression model was applied with Age; ISS;TBI and Treatment as co-variables.
TAG54:8-FA18:3	3.12779e-07	2.20599	0.000311841	4.61392	TAG	10	Adjusted p-value calculated by BH method was used to rank each sepcies.
TAG44:2-FA16:0	3.51843e-07	1.33387	0.000350788	2.52077	TAG	11
PE(O-18:0/18:2)	3.58956e-07	0.812972	0.000357879	1.75683	PE	12
TAG44:3-FA18:2	3.83258e-07	2.31437	0.000382108	4.97388	TAG	13
TAG54:7-FA18:2	5.92504e-07	1.91829	0.000590727	3.77975	TAG	14
TAG54:7-FA18:3	8.06611e-07	1.77621	0.000804191	3.42526	TAG	15
TAG54:5-FA18:0	8.11269e-07	1.00044	0.000808835	2.00061	TAG	16
TAG56:10-FA18:2	1.20616e-06	0.713231	0.00120254	1.63947	TAG	17
TAG56:5-FA20:1	1.72601e-06	0.830616	0.00172084	1.77844	TAG	18
TAG55:3-FA18:2	1.79314e-06	0.688004	0.00178776	1.61105	TAG	19
TAG54:6-FA18:1	1.96817e-06	1.00275	0.00196226	2.00382	TAG	20
PE(O-16:0/22:6)	2.22205e-06	0.419129	0.00221538	1.33712	PE	21
TAG44:2-FA18:2	2.35104e-06	1.43484	0.00234399	2.70351	TAG	22
PC(18:0/18:1)	2.35645e-06	0.277803	0.00234938	1.21235	PC	23
TAG55:4-FA18:2	2.58531e-06	1.03535	0.00257755	2.04962	TAG	24
TAG44:1-FA16:0	2.98149e-06	0.976475	0.00297255	1.96765	TAG	25
TAG54:6-FA18:2	3.24171e-06	1.47517	0.00323198	2.78016	TAG	26
TAG55:5-FA18:2	3.42632e-06	1.83141	0.00341604	3.55886	TAG	27
TAG46:2-FA18:1	5.09107e-06	1.81473	0.0050758	3.51794	TAG	28
PE(O-18:0/18:1)	5.44888e-06	0.800207	0.00543253	1.74135	PE	29
TAG44:2-FA16:1	5.66088e-06	1.17976	0.0056439	2.26539	TAG	30
TAG52:6-FA18:1	6.11012e-06	0.647418	0.00609179	1.56636	TAG	31
PE(18:1/20:5)	6.34945e-06	0.100497	0.00633041	1.07214	PE	32
TAG54:6-FA18:3	6.36656e-06	0.99731	0.00634746	1.99627	TAG	33
TAG44:2-FA18:1	6.65441e-06	2.38724	0.00663445	5.23155	TAG	34
TAG56:3-FA18:2	8.95037e-06	0.655535	0.00892352	1.5752	TAG	35
TAG56:3-FA20:0	9.2356e-06	0.753569	0.00920789	1.68596	TAG	36
TAG52:6-FA16:0	1.05845e-05	0.701151	0.0105528	1.6258	TAG	37
TAG54:4-FA18:0	1.19076e-05	0.744259	0.0118718	1.67511	TAG	38
TAG44:1-FA18:1	1.46791e-05	1.11428	0.0146351	2.16487	TAG	39
TAG56:4-FA18:2	1.55684e-05	0.69669	0.0155217	1.62078	TAG	40
PE(18:0/18:2)	1.95228e-05	0.333481	0.0194643	1.26005	PE	41
TAG56:6-FA18:3	2.04769e-05	0.604751	0.0204154	1.52072	TAG	42
PE(O-16:0/22:4)	2.15761e-05	0.402549	0.0215113	1.32184	PE	43
PE(P-18:0/18:1)	2.17785e-05	0.319906	0.0217131	1.24825	PE	44
TAG46:1-FA18:0	2.19014e-05	1.0956	0.0218357	2.13702	TAG	45
TAG54:5-FA18:1	2.89196e-05	0.723354	0.0288328	1.65102	TAG	46
TAG56:6-FA20:2	2.98127e-05	0.624123	0.0297233	1.54127	TAG	47
TAG42:1-FA16:0	3.18195e-05	1.36743	0.031724	2.58011	TAG	48
TAG42:2-FA18:2	3.90309e-05	1.5901	0.0389138	3.01069	TAG	49
TAG50:5-FA16:0	4.05184e-05	0.501608	0.0403968	1.41579	TAG	50
TAG56:5-FA18:2	4.10638e-05	0.595038	0.0409406	1.51051	TAG	51
TAG53:6-FA18:2	4.1125e-05	0.215974	0.0410016	1.16149	TAG	52
TAG50:5-FA18:1	4.22329e-05	0.38726	0.0421062	1.30791	TAG	53
TAG54:5-FA18:3	4.4815e-05	0.664592	0.0446805	1.58512	TAG	54
TAG52:8-FA18:2	4.48455e-05	0.494013	0.0447109	1.40836	TAG	55
TAG54:4-FA18:3	4.60222e-05	0.58656	0.0458841	1.50166	TAG	56
TAG54:5-FA22:1	4.87968e-05	0.792453	0.0486505	1.73202	TAG	57
TAG50:5-FA20:5	4.93294e-05	0.765365	0.0491814	1.6998	TAG	58
TAG46:3-FA18:3	5.67617e-05	0.511982	0.0565914	1.42601	TAG	59
PE(P-16:0/18:1)	5.78561e-05	0.333124	0.0576826	1.25974	PE	60
TAG52:5-FA22:5	6.16678e-05	0.52715	0.0614828	1.44108	TAG	61
TAG42:1-FA16:1	6.17034e-05	0.968749	0.0615183	1.95714	TAG	62
PE(16:0/18:2)	6.96312e-05	0.358897	0.0694223	1.28245	PE	63
TAG56:2-FA16:0	7.43317e-05	0.78354	0.0741087	1.72135	TAG	64
PE(16:0/20:5)	7.78558e-05	0.137761	0.0776222	1.1002	PE	65
TAG54:2-FA20:0	8.10896e-05	0.480261	0.0808464	1.395	TAG	66
TAG50:5-FA14:0	8.46951e-05	0.494068	0.084441	1.40841	TAG	67
TAG54:5-FA18:2	8.48426e-05	0.743948	0.0845881	1.67475	TAG	68
TAG52:6-FA22:6	9.67405e-05	0.566161	0.0964503	1.48058	TAG	69
PE(18:0/20:5)	9.94318e-05	0.453876	0.0991335	1.36972	PE	70
TAG56:2-FA20:0	0.000115659	0.536761	0.115312	1.45071	TAG	71
PE(18:0/18:3)	0.000116207	0.395488	0.115859	1.31539	PE	72
TAG56:4-FA20:1	0.00011845	0.509085	0.118095	1.42315	TAG	73
TAG54:3-FA18:3	0.000120451	0.538432	0.12009	1.45239	TAG	74
TAG53:7-FA18:3	0.000121454	0.146372	0.12109	1.10678	TAG	75
TAG42:1-FA18:1	0.000122696	1.20881	0.122328	2.31147	TAG	76
TAG52:7-FA20:5	0.000125822	1.01243	0.125444	2.01731	TAG	77
TAG56:5-FA20:2	0.000126933	0.484165	0.126553	1.39878	TAG	78
PE(O-18:0/22:4)	0.000131681	0.536155	0.131286	1.4501	PE	79
TAG48:4-FA16:0	0.000131796	0.339207	0.131401	1.26506	TAG	80
TAG55:2-FA18:1	0.000132442	0.390551	0.132045	1.31089	TAG	81
TAG55:3-FA18:1	0.000143501	0.478207	0.14307	1.39301	TAG	82
TAG42:1-FA14:0	0.000156187	1.03887	0.155718	2.05462	TAG	83
TAG52:5-FA16:0	0.000164435	0.662231	0.163941	1.58253	TAG	84
TAG54:8-FA22:6	0.000166017	0.590517	0.165519	1.50579	TAG	85
TAG58:10-FA22:6	0.000174707	0.635421	0.174182	1.55339	TAG	86
TAG42:0-FA16:0	0.000175211	0.808436	0.174685	1.75131	TAG	87
TAG56:9-FA20:5	0.000195475	1.08798	0.194889	2.12576	TAG	88
TAG58:10-FA18:2	0.000199721	0.587053	0.199122	1.50217	TAG	89
TAG51:5-FA18:2	0.00021106	0.637183	0.210427	1.55529	TAG	90
TAG55:4-FA18:1	0.000212941	0.694701	0.212302	1.61855	TAG	91
TAG57:3-FA18:2	0.000228524	0.583813	0.227839	1.49881	TAG	92
TAG55:2-FA18:2	0.000230047	0.698606	0.229357	1.62294	TAG	93
TAG54:3-FA18:0	0.000238358	0.442502	0.237643	1.35896	TAG	94
TAG58:3-FA18:1	0.000251602	0.734984	0.250847	1.66438	TAG	95
PC(18:0/18:0)	0.000257241	0.184846	0.25647	1.1367	PC	96
PE(16:0/18:3)	0.000258986	0.297465	0.258209	1.22898	PE	97
TAG48:5-FA18:2	0.000281188	0.40515	0.280345	1.32423	TAG	98
TAG52:6-FA14:0	0.000295925	0.376453	0.295037	1.29815	TAG	99
PE(O-18:0/22:6)	0.000310388	0.477557	0.309457	1.39238	PE	100
PE(18:1/18:1)	0.000320367	0.345145	0.319406	1.27028	PE	101
TAG56:7-FA18:0	0.000331493	0.461224	0.330498	1.37671	TAG	102
TAG56:3-FA20:1	0.000340634	0.460407	0.339613	1.37593	TAG	103
TAG58:9-FA18:2	0.000363933	0.492439	0.362842	1.40682	TAG	104
TAG56:3-FA18:0	0.000390833	0.378759	0.389661	1.30022	TAG	105
TAG52:7-FA22:6	0.000394986	0.471097	0.393801	1.38616	TAG	106
TAG56:8-FA18:1	0.000398969	0.508006	0.397772	1.42208	TAG	107
TAG58:9-FA22:6	0.000417077	0.486825	0.415826	1.40136	TAG	108
PE(18:1/18:2)	0.000420369	0.322192	0.419108	1.25023	PE	109
PE(16:0/22:6)	0.000421551	0.300722	0.420287	1.23176	PE	110
TAG55:1-FA18:1	0.000421847	0.508029	0.420582	1.42211	TAG	111
TAG56:3-FA20:2	0.000425797	0.346316	0.42452	1.27131	TAG	112
TAG56:1-FA18:1	0.000441289	0.343481	0.439965	1.26881	TAG	113
TAG54:5-FA20:5	0.000458552	0.446399	0.457177	1.36263	TAG	114
PC(18:1/18:1)	0.000470095	0.198313	0.468684	1.14736	PC	115
TAG56:3-FA18:1	0.000513694	0.454342	0.512153	1.37016	TAG	116
TAG57:2-FA18:1	0.000516533	0.410262	0.514984	1.32893	TAG	117
TAG55:6-FA18:1	0.000521414	0.101654	0.51985	1.073	TAG	118
TAG46:2-FA18:2	0.000523832	0.333889	0.52226	1.26041	TAG	119
TAG54:4-FA20:1	0.000529309	0.399373	0.527721	1.31893	TAG	120
TAG48:4-FA14:0	0.000546269	0.353238	0.54463	1.27742	TAG	121
TAG54:2-FA18:2	0.00055685	0.416507	0.55518	1.33469	TAG	122
TAG58:7-FA22:6	0.000570635	0.329262	0.568923	1.25637	TAG	123
TAG53:0-FA16:0	0.000574136	0.409155	0.572413	1.32791	TAG	124
TAG58:8-FA22:6	0.000601176	0.363179	0.599372	1.28626	TAG	125
TAG56:2-FA18:0	0.000615473	0.430858	0.613627	1.34803	TAG	126
TAG54:7-FA22:5	0.000616365	0.409533	0.614516	1.32826	TAG	127
DAG(16:0/20:5)	0.000620751	0.752795	0.618889	1.68505	DAG	128
TAG54:6-FA22:6	0.000624392	0.343782	0.622519	1.26908	TAG	129
TAG56:8-FA20:5	0.000647932	0.787183	0.645988	1.7257	TAG	130
TAG52:6-FA18:3	0.000652982	0.612674	0.651023	1.52909	TAG	131
TAG54:3-FA18:2	0.000677583	0.425147	0.675551	1.34271	TAG	132
TAG56:2-FA18:1	0.000687404	0.356544	0.685342	1.28035	TAG	133
TAG55:5-FA18:1	0.00070727	0.558222	0.705148	1.47245	TAG	134
TAG56:4-FA18:1	0.000742528	0.377269	0.7403	1.29888	TAG	135
TAG56:9-FA22:6	0.000750419	0.471223	0.748168	1.38628	TAG	136
TAG52:6-FA18:2	0.000760571	0.549131	0.75829	1.4632	TAG	137
TAG52:5-FA20:5	0.000774727	0.473238	0.772403	1.38822	TAG	138
TAG56:6-FA20:5	0.000785797	0.471939	0.783439	1.38697	TAG	139
TAG54:7-FA20:5	0.000786945	0.555824	0.784584	1.47001	TAG	140
TAG58:9-FA18:1	0.000821233	0.396994	0.818769	1.31676	TAG	141
PE(18:0/22:6)	0.000821371	0.26908	0.818907	1.20504	PE	142
DAG(18:2/20:5)	0.000824904	1.12767	0.822429	2.18505	DAG	143
TAG52:4-FA18:0	0.000835301	0.362418	0.832795	1.28558	TAG	144
TAG54:8-FA20:5	0.000841238	0.77982	0.838714	1.71692	TAG	145
DAG(16:0/22:6)	0.000842002	0.320103	0.839476	1.24842	DAG	146
TAG54:4-FA18:2	0.000846582	0.477051	0.844043	1.3919	TAG	147
TAG56:2-FA20:1	0.000860706	0.351335	0.858124	1.27574	TAG	148
TAG53:5-FA18:3	0.000904363	0.383957	0.90165	1.30492	TAG	149
DAG(18:0/22:6)	0.000929794	0.193685	0.927004	1.14368	DAG	150
TAG54:7-FA22:6	0.000955185	0.380841	0.95232	1.3021	TAG	151
TAG58:10-FA22:5	0.001023	0.489831	1	1.40428	TAG	152
TAG56:3-FA16:0	0.00102596	0.328635	1	1.25582	TAG	153
TAG54:2-FA18:0	0.00102665	0.312591	1	1.24194	TAG	154
PE(P-18:0/22:4)	0.00104723	0.232901	1	1.1752	PE	155
PE(P-18:0/22:6)	0.00106879	0.166817	1	1.12258	PE	156
TAG53:3-FA16:0	0.00111131	0.496657	1	1.41094	TAG	157
TAG52:5-FA18:3	0.00112815	0.559947	1	1.47421	TAG	158
PE(18:0/18:0)	0.00112866	0.196015	1	1.14553	PE	159
TAG58:7-FA18:0	0.00113676	0.375489	1	1.29728	TAG	160
TAG56:4-FA20:2	0.00116045	0.357902	1	1.28156	TAG	161
TAG52:5-FA18:1	0.00117906	0.39253	1	1.31269	TAG	162
TAG52:6-FA20:5	0.00119113	0.563438	1	1.47779	TAG	163
PC(16:0/18:1)	0.00120107	0.166578	1	1.12239	PC	164
TAG55:7-FA22:6	0.00121714	0.32264	1	1.25062	TAG	165
TAG58:8-FA18:2	0.00124665	0.379578	1	1.30096	TAG	166
TAG57:8-FA22:6	0.0012674	0.285045	1	1.21845	TAG	167
TAG53:4-FA16:0	0.00129268	0.554577	1	1.46874	TAG	168
PC(18:0/18:3)	0.00132733	0.252404	1	1.19119	PC	169
DAG(18:2/22:6)	0.00138904	0.507348	1	1.42143	DAG	170
TAG51:4-FA16:0	0.00140229	0.154048	1	1.11269	TAG	171
TAG56:6-FA22:6	0.00151355	0.268811	1	1.20481	TAG	172
TAG54:5-FA20:2	0.00154751	0.416676	1	1.33485	TAG	173
TAG48:4-FA20:4	0.00157291	0.413997	1	1.33237	TAG	174
TAG56:8-FA16:0	0.00158444	0.369677	1	1.29206	TAG	175
TAG56:7-FA20:5	0.0015925	0.545665	1	1.45969	TAG	176
TAG56:8-FA22:6	0.0016489	0.385588	1	1.30639	TAG	177
TAG54:2-FA18:1	0.00176284	0.289028	1	1.22182	TAG	178
PC(14:0/18:1)	0.00179116	0.179649	1	1.13261	PC	179
TAG54:6-FA20:5	0.00183812	0.429793	1	1.34704	TAG	180
PE(18:1/22:6)	0.00186051	0.286997	1	1.2201	PE	181
TAG50:5-FA18:2	0.00188857	0.4203	1	1.33821	TAG	182
TAG56:8-FA18:2	0.00189429	0.385965	1	1.30673	TAG	183
TAG40:0-FA16:0	0.00195285	0.723083	1	1.65071	TAG	184
TAG58:2-FA18:1	0.00196077	0.494632	1	1.40896	TAG	185
TAG52:5-FA18:2	0.00196469	0.523054	1	1.43699	TAG	186
TAG55:1-FA16:0	0.00200595	0.358894	1	1.28244	TAG	187
TAG56:9-FA18:3	0.0020258	0.456437	1	1.37215	TAG	188
TAG54:0-FA16:0	0.00208269	0.235538	1	1.17735	TAG	189
TAG45:1-FA18:1	0.00209483	0.301993	1	1.23285	TAG	190
PI(16:0/22:5)	0.00212059	0.00136693	1	1.00095	PI	191
TAG54:4-FA18:1	0.0021337	0.382354	1	1.30347	TAG	192
TAG54:4-FA22:1	0.00221905	0.457207	1	1.37288	TAG	193
TAG56:7-FA18:3	0.00232539	0.380294	1	1.30161	TAG	194
TAG46:3-FA16:0	0.00239131	0.325375	1	1.25299	TAG	195
TAG56:7-FA18:1	0.0024032	0.270393	1	1.20614	TAG	196
TAG58:8-FA18:1	0.00242042	0.312286	1	1.24167	TAG	197
TAG54:3-FA20:1	0.00243301	0.335154	1	1.26151	TAG	198
TAG48:4-FA18:1	0.00245897	0.304194	1	1.23473	TAG	199
DAG(16:0/18:3)	0.00249179	0.375934	1	1.29768	DAG	200
TAG52:7-FA18:1	0.00253702	0.325034	1	1.25269	TAG	201
TAG50:4-FA14:0	0.0026168	0.416059	1	1.33428	TAG	202
TAG56:7-FA22:6	0.00270222	0.262309	1	1.1994	TAG	203
PE(18:0/16:0)	0.00275003	0.174725	1	1.12875	PE	204
TAG56:6-FA18:2	0.0027861	0.371654	1	1.29383	TAG	205
PE(18:0/20:4)	0.00281133	0.271534	1	1.20709	PE	206
TAG53:5-FA18:2	0.00282784	0.106119	1	1.07633	TAG	207
TAG58:9-FA22:5	0.00290062	0.381659	1	1.30284	TAG	208
PE(O-18:0/22:5)	0.00310392	0.387073	1	1.30774	PE	209
PC(18:1/16:1)	0.0031698	0.195591	1	1.14519	PC	210
TAG52:3-FA14:0	0.00336231	0.295307	1	1.22715	TAG	211
DAG(18:1/20:5)	0.00337404	0.695031	1	1.61892	DAG	212
TAG53:4-FA18:3	0.00338407	0.363624	1	1.28665	TAG	213
DAG(18:2/18:3)	0.00339826	0.583106	1	1.49807	DAG	214
DAG(18:1/22:6)	0.00348772	0.329631	1	1.25669	DAG	215
TAG52:4-FA22:1	0.00356852	0.421751	1	1.33955	TAG	216
TAG51:5-FA18:3	0.00360707	0.394636	1	1.31461	TAG	217
TAG54:4-FA16:1	0.00371425	0.331669	1	1.25847	TAG	218
TAG58:6-FA20:4	0.00386042	0.271202	1	1.20681	TAG	219
TAG51:4-FA18:1	0.00402146	0.182578	1	1.13491	TAG	220
DAG(18:0/18:3)	0.00409865	0.343998	1	1.26927	DAG	221
TAG54:1-FA20:0	0.00410244	0.21879	1	1.16376	TAG	222
TAG60:10-FA22:6	0.00410394	0.312728	1	1.24205	TAG	223
TAG54:6-FA16:0	0.00422079	0.287437	1	1.22047	TAG	224
TAG50:4-FA16:0	0.00425447	0.326137	1	1.25365	TAG	225
TAG56:1-FA16:0	0.00429866	0.43728	1	1.35405	TAG	226
TAG53:1-FA16:0	0.00443687	0.195504	1	1.14512	TAG	227
PC(18:2/18:3)	0.00444645	0.218217	1	1.16329	PC	228
TAG55:7-FA18:1	0.00450031	0.0962378	1	1.06898	TAG	229
TAG54:1-FA16:0	0.00459097	0.266374	1	1.20278	TAG	230
TAG50:5-FA18:3	0.00461289	0.377346	1	1.29895	TAG	231
TAG53:2-FA18:2	0.00465768	0.294311	1	1.2263	TAG	232
CER(16:0)	0.00471221	0.198109	1	1.14719	CER	233
TAG52:6-FA16:1	0.00479352	0.410153	1	1.32883	TAG	234
TAG60:12-FA22:6	0.00482433	0.350169	1	1.27471	TAG	235
TAG58:7-FA22:5	0.00486324	0.240819	1	1.18166	TAG	236
PC(16:0/18:0)	0.00487237	0.126647	1	1.09175	PC	237
TAG55:7-FA15:0	0.00503988	0.257465	1	1.19538	TAG	238
DAG(14:0/22:6)	0.00505054	0.305261	1	1.23564	DAG	239
PC(18:1/18:3)	0.00509549	0.327696	1	1.25501	PC	240
TAG52:4-FA20:2	0.00513118	0.343788	1	1.26908	TAG	241
TAG54:3-FA18:1	0.00515607	0.277068	1	1.21173	TAG	242
TAG52:4-FA22:4	0.0051649	0.34977	1	1.27436	TAG	243
TAG56:4-FA18:0	0.00533897	0.272078	1	1.20755	TAG	244
PI(18:0/18:3)	0.00535509	0.00346857	1	1.00241	PI	245
CER(22:1)	0.00540907	0.212112	1	1.15838	CER	246
TAG58:10-FA20:5	0.00554337	0.74377	1	1.67455	TAG	247
PE(O-16:0/22:5)	0.0055953	0.323378	1	1.25126	PE	248
DAG(18:0/18:2)	0.00560677	0.320437	1	1.24871	DAG	249
TAG52:4-FA18:3	0.00561117	0.382525	1	1.30362	TAG	250
TAG58:7-FA18:2	0.00569739	0.318404	1	1.24695	TAG	251
TAG58:8-FA22:5	0.00573571	0.287755	1	1.22074	TAG	252
TAG53:4-FA18:2	0.00580319	0.383429	1	1.30444	TAG	253
PC(16:0/18:3)	0.00595132	0.222977	1	1.16714	PC	254
PE(18:0/22:5)	0.00596449	0.304931	1	1.23536	PE	255
TAG56:8-FA22:5	0.00610941	0.33676	1	1.26292	TAG	256
TAG47:2-FA18:1	0.00621093	0.23242	1	1.1748	TAG	257
TAG56:7-FA16:0	0.00626667	0.303599	1	1.23422	TAG	258
TAG52:3-FA18:0	0.00642797	0.321126	1	1.2493	TAG	259
TAG52:4-FA16:0	0.00649034	0.439216	1	1.35587	TAG	260
TAG58:6-FA22:5	0.00654152	0.253009	1	1.19169	TAG	261
TAG50:3-FA18:3	0.00658952	0.336554	1	1.26274	TAG	262
TAG52:4-FA18:1	0.00668569	0.33534	1	1.26167	TAG	263
TAG54:2-FA16:0	0.00673098	0.29644	1	1.22811	TAG	264
TAG54:4-FA20:2	0.00705315	0.335769	1	1.26205	TAG	265
TAG50:4-FA18:2	0.00706162	0.380486	1	1.30178	TAG	266
TAG54:3-FA16:1	0.00714022	0.289294	1	1.22204	TAG	267
TAG56:8-FA16:1	0.00722918	0.268362	1	1.20444	TAG	268
TAG45:1-FA16:0	0.00730102	0.217685	1	1.16287	TAG	269
TAG54:2-FA20:1	0.00731935	0.265879	1	1.20237	TAG	270
TAG56:6-FA18:0	0.0075071	0.319113	1	1.24756	TAG	271
TAG53:4-FA17:0	0.00751899	0.419573	1	1.33753	TAG	272
TAG58:5-FA18:1	0.0075932	0.270314	1	1.20607	TAG	273
TAG49:3-FA16:0	0.00771523	0.287039	1	1.22013	TAG	274
TAG52:4-FA20:0	0.00786619	0.511875	1	1.4259	TAG	275
PE(P-18:0/20:5)	0.00793967	0.291976	1	1.22432	PE	276
TAG52:4-FA18:2	0.00803557	0.39186	1	1.31208	TAG	277
TAG52:3-FA18:3	0.00821391	0.354508	1	1.27855	TAG	278
TAG52:5-FA14:0	0.00826538	0.242851	1	1.18333	TAG	279
MAG(20:1)	0.00834208	0.203743	1	1.15168	MAG	280
TAG52:2-FA20:2	0.00838957	0.378188	1	1.29971	TAG	281
TAG54:3-FA16:0	0.00840847	0.291846	1	1.22421	TAG	282
TAG50:4-FA18:1	0.00855548	0.29091	1	1.22341	TAG	283
TAG54:7-FA16:1	0.0087363	0.255631	1	1.19386	TAG	284
TAG58:7-FA18:1	0.00895847	0.236783	1	1.17836	TAG	285
TAG52:3-FA20:1	0.0090114	0.273243	1	1.20852	TAG	286
TAG58:6-FA18:0	0.00916648	0.283366	1	1.21703	TAG	287
TAG54:5-FA22:5	0.0094127	0.311939	1	1.24137	TAG	288
TAG54:1-FA18:1	0.00943532	0.228151	1	1.17133	TAG	289
TAG50:3-FA18:0	0.00968523	0.232174	1	1.1746	TAG	290
DAG(16:1/22:6)	0.00993076	0.237064	1	1.17859	DAG	291
TAG48:5-FA18:3	0.0100761	0.247573	1	1.18721	TAG	292
TAG54:1-FA18:0	0.0101825	0.224092	1	1.16804	TAG	293
PE(16:0/20:4)	0.0103637	0.274378	1	1.20947	PE	294
TAG52:5-FA16:1	0.0105941	0.384056	1	1.30501	TAG	295
TAG52:4-FA14:0	0.010691	0.250142	1	1.18932	TAG	296
PE(P-18:0/18:2)	0.0106971	0.101166	1	1.07264	PE	297
TAG53:2-FA18:0	0.0107561	0.182733	1	1.13503	TAG	298
TAG58:7-FA20:4	0.0108479	0.26855	1	1.2046	TAG	299
TAG50:5-FA14:1	0.0109888	0.372131	1	1.29426	TAG	300
TAG52:2-FA14:0	0.0110499	0.270928	1	1.20658	TAG	301
PE(P-16:0/22:6)	0.0114463	0.101235	1	1.07269	PE	302
PE(18:0/20:3)	0.0115916	0.238403	1	1.17969	PE	303
TAG47:2-FA18:2	0.0117197	0.222056	1	1.16639	TAG	304
TAG50:3-FA14:0	0.0119641	0.289722	1	1.2224	TAG	305
PE(18:1/18:3)	0.0121263	0.16081	1	1.11791	PE	306
TAG50:2-FA20:2	0.0121531	0.294055	1	1.22608	TAG	307
TAG54:3-FA20:2	0.0123935	0.27369	1	1.2089	TAG	308
DAG(16:0/18:2)	0.012432	0.329822	1	1.25686	DAG	309
TAG44:1-FA16:1	0.0126495	0.310575	1	1.2402	TAG	310
TAG54:6-FA22:5	0.0127465	0.272243	1	1.20768	TAG	311
TAG56:7-FA20:3	0.0127607	0.313057	1	1.24234	TAG	312
CER(24:1)	0.0127714	0.183977	1	1.13601	CER	313
TAG53:2-FA16:0	0.0131337	0.26895	1	1.20493	TAG	314
TAG56:7-FA18:2	0.0137467	0.304149	1	1.23469	TAG	315
TAG56:5-FA18:1	0.0140084	0.244575	1	1.18474	TAG	316
TAG52:2-FA18:0	0.0148683	0.31069	1	1.2403	TAG	317
TAG51:4-FA15:0	0.0150134	0.405373	1	1.32443	TAG	318
DAG(18:2/22:5)	0.0156632	0.274872	1	1.20989	DAG	319
TAG46:3-FA14:0	0.0157178	0.228228	1	1.1714	TAG	320
TAG56:9-FA20:4	0.0157179	0.329569	1	1.25664	TAG	321
TAG56:8-FA18:3	0.015797	0.315107	1	1.2441	TAG	322
TAG51:3-FA18:3	0.0159275	0.258948	1	1.19661	TAG	323
PC(20:0/14:1)	0.0167542	0.139858	1	1.1018	PC	324
TAG56:7-FA22:5	0.0170156	0.292562	1	1.22481	TAG	325
TAG54:2-FA20:2	0.0171914	0.282033	1	1.21591	TAG	326
PE(P-18:1/20:5)	0.0174866	0.117897	1	1.08515	PE	327
DAG(16:0/22:5)	0.0176851	0.213917	1	1.15983	DAG	328
TAG60:11-FA22:6	0.0182423	0.220047	1	1.16477	TAG	329
TAG52:1-FA20:1	0.0183115	0.330815	1	1.25772	TAG	330
TAG51:4-FA18:2	0.0183573	0.400786	1	1.32023	TAG	331
TAG50:5-FA16:1	0.0187825	0.283068	1	1.21678	TAG	332
PE(16:0/20:3)	0.0191251	0.283074	1	1.21678	PE	333
TAG54:1-FA20:1	0.0192734	0.241773	1	1.18244	TAG	334
TAG48:2-FA14:0	0.0195272	0.274483	1	1.20956	TAG	335
TAG53:3-FA18:2	0.0202908	0.296489	1	1.22815	TAG	336
TAG54:5-FA16:1	0.0205922	0.284338	1	1.21785	TAG	337
TAG52:1-FA20:0	0.02064	0.183053	1	1.13528	TAG	338
TAG54:6-FA20:3	0.0207792	0.343533	1	1.26886	TAG	339
TAG50:2-FA18:2	0.0212659	0.331886	1	1.25866	TAG	340
PC(18:0/16:1)	0.0214982	0.216593	1	1.16199	PC	341
TAG54:4-FA16:0	0.0221075	0.264906	1	1.20156	TAG	342
TAG48:4-FA18:2	0.0222991	0.268246	1	1.20434	TAG	343
TAG51:4-FA18:3	0.0224979	0.272986	1	1.20831	TAG	344
DAG(16:0/18:0)	0.0225649	0.111756	1	1.08054	DAG	345
TAG48:3-FA18:3	0.022677	0.226937	1	1.17035	TAG	346
TAG47:1-FA16:1	0.0227252	0.228791	1	1.17185	TAG	347
TAG56:4-FA20:3	0.0235263	0.194008	1	1.14394	TAG	348
TAG52:3-FA18:2	0.0240398	0.249551	1	1.18884	TAG	349
TAG50:1-FA20:1	0.0243135	0.269239	1	1.20517	TAG	350
PE(16:0/22:5)	0.0245372	0.276838	1	1.21154	PE	351
TAG48:2-FA18:2	0.0247256	0.254563	1	1.19297	TAG	352
TAG46:1-FA18:1	0.0248853	0.243142	1	1.18357	TAG	353
PE(16:0/16:1)	0.0254073	0.123419	1	1.08931	PE	354
TAG53:4-FA18:1	0.025915	0.0736782	1	1.0524	TAG	355
TAG52:5-FA20:3	0.0259619	0.234487	1	1.17649	TAG	356
TAG58:7-FA16:0	0.0260246	0.233481	1	1.17567	TAG	357
TAG56:5-FA18:0	0.0260895	0.230575	1	1.1733	TAG	358
PE(18:1/16:1)	0.0261111	0.151621	1	1.11082	PE	359
PE(18:0/22:4)	0.0262476	0.269623	1	1.20549	PE	360
TAG52:2-FA20:1	0.0263203	0.261874	1	1.19903	TAG	361
DAG(16:0/16:0)	0.0263211	0.196431	1	1.14586	DAG	362
TAG54:6-FA16:1	0.0263321	0.253796	1	1.19234	TAG	363
PE(16:0/20:2)	0.0263536	0.222613	1	1.16684	PE	364
TAG50:2-FA18:0	0.0266342	0.234199	1	1.17625	TAG	365
TAG48:3-FA14:0	0.0266353	0.265713	1	1.20223	TAG	366
TAG52:3-FA16:0	0.0276465	0.241798	1	1.18247	TAG	367
TAG48:4-FA18:3	0.0277682	0.216291	1	1.16174	TAG	368
TAG56:7-FA16:1	0.0280021	0.220577	1	1.1652	TAG	369
TAG48:0-FA16:0	0.0282087	0.316537	1	1.24534	TAG	370
TAG52:2-FA18:2	0.0282547	0.299722	1	1.23091	TAG	371
TAG58:6-FA16:0	0.0284909	0.27441	1	1.2095	TAG	372
TAG56:6-FA20:3	0.0285274	0.225888	1	1.1695	TAG	373
TAG48:4-FA16:1	0.0285559	0.26231	1	1.1994	TAG	374
TAG52:3-FA20:2	0.0288387	0.258818	1	1.1965	TAG	375
TAG48:4-FA12:0	0.0293745	0.234456	1	1.17646	TAG	376
PE(P-18:0/18:0)	0.0299665	0.0183745	1	1.01282	PE	377
TAG52:0-FA20:0	0.0304644	0.128542	1	1.09319	TAG	378
TAG58:7-FA22:4	0.0304865	0.264734	1	1.20141	TAG	379
TAG51:2-FA18:2	0.0313987	0.263631	1	1.2005	TAG	380
TAG51:3-FA18:1	0.0315585	0.151859	1	1.111	TAG	381
TAG49:3-FA18:2	0.031596	0.252221	1	1.19104	TAG	382
TAG51:2-FA18:0	0.0316435	0.180553	1	1.13332	TAG	383
PE(16:0/16:0)	0.0317401	0.0449003	1	1.03161	PE	384
TAG50:2-FA16:0	0.0322924	0.274215	1	1.20934	TAG	385
TAG52:3-FA20:0	0.0324492	0.304445	1	1.23494	TAG	386
TAG52:3-FA22:1	0.0324937	0.286498	1	1.21968	TAG	387
DAG(18:1/20:1)	0.0329876	0.183004	1	1.13524	DAG	388
TAG50:4-FA18:3	0.0332009	0.260394	1	1.19781	TAG	389
TAG49:3-FA18:3	0.0332485	0.21613	1	1.16161	TAG	390
TAG52:3-FA18:1	0.0336036	0.224084	1	1.16804	TAG	391
PE(18:0/16:1)	0.0336968	0.0247011	1	1.01727	PE	392
TAG52:2-FA20:0	0.034062	0.219095	1	1.164	TAG	393
DCER(16:0)	0.0343342	0.103158	1	1.07412	DCER	394
PC(18:0/18:2)	0.0344693	0.113951	1	1.08219	PC	395
TAG54:8-FA20:4	0.0346478	0.275922	1	1.21077	TAG	396
TAG50:1-FA16:0	0.0351167	0.231133	1	1.17376	TAG	397
TAG48:1-FA16:1	0.0357849	0.369376	1	1.29179	TAG	398
TAG52:1-FA16:1	0.0359959	0.229149	1	1.17214	TAG	399
TAG50:3-FA18:1	0.0361942	0.247792	1	1.18739	TAG	400
TAG51:3-FA16:0	0.0363137	0.098207	1	1.07044	TAG	401
TAG40:0-FA14:0	0.0374863	0.424958	1	1.34253	TAG	402
TAG53:4-FA18:0	0.0376175	0.0539243	1	1.03808	TAG	403
PE(P-18:1/18:1)	0.0377917	0.0780344	1	1.05558	PE	404
TAG53:3-FA18:0	0.0394366	0.0538509	1	1.03803	TAG	405
TAG49:2-FA15:0	0.0396139	0.26745	1	1.20368	TAG	406
TAG58:6-FA18:1	0.0406874	0.202056	1	1.15034	TAG	407
PE(18:1/20:4)	0.0412903	0.229311	1	1.17227	PE	408
CER(22:0)	0.0413792	0.16975	1	1.12486	CER	409
TAG46:2-FA14:0	0.0418835	0.217886	1	1.16303	TAG	410
TAG49:3-FA15:0	0.0421848	0.266057	1	1.20252	TAG	411
TAG48:2-FA16:0	0.0423114	0.257276	1	1.19522	TAG	412
TAG50:0-FA16:0	0.0423762	0.259986	1	1.19747	TAG	413
DAG(16:1/20:2)	0.042414	0.188345	1	1.13946	DAG	414
PC(18:1/20:5)	0.0428074	0.248101	1	1.18764	PC	415
TAG44:0-FA16:0	0.0429496	0.221498	1	1.16594	TAG	416
DAG(16:0/18:1)	0.0438162	0.173153	1	1.12752	DAG	417
TAG53:3-FA18:1	0.0440791	0.160223	1	1.11746	TAG	418
PE(P-16:0/20:5)	0.0441196	0.116111	1	1.08381	PE	419
TAG60:11-FA22:5	0.0444008	0.252265	1	1.19108	TAG	420
TAG54:5-FA16:0	0.0444069	0.224345	1	1.16825	TAG	421
TAG56:5-FA20:4	0.0452016	0.199353	1	1.14818	TAG	422
TAG52:2-FA16:1	0.0452646	0.209531	1	1.15631	TAG	423
PC(16:0/20:5)	0.0456389	0.133166	1	1.0967	PC	424
TAG52:1-FA18:0	0.0462023	0.190413	1	1.14109	TAG	425
TAG48:3-FA16:0	0.0462748	0.232041	1	1.1745	TAG	426
TAG50:3-FA16:0	0.0465981	0.274647	1	1.2097	TAG	427
TAG50:1-FA18:1	0.0470318	0.257975	1	1.1958	TAG	428
TAG56:7-FA22:4	0.0471768	0.268811	1	1.20481	TAG	429
TAG48:1-FA16:0	0.0472835	0.311621	1	1.2411	TAG	430
DAG(15:0/18:2)	0.0474019	0.118372	1	1.08551	DAG	431
TAG58:6-FA22:4	0.0477969	0.214456	1	1.16027	TAG	432
CER(20:0)	0.0482833	0.161874	1	1.11874	CER	433
PC(18:0/20:5)	0.0500058	0.127553	1	1.09244	PC	434
TAG50:0-FA18:0	0.0503481	0.258481	1	1.19622	TAG	435
DAG(18:0/18:1)	0.0506696	0.144092	1	1.10504	DAG	436
TAG52:4-FA16:1	0.050973	0.252265	1	1.19108	TAG	437
TAG50:3-FA18:2	0.0513838	0.257809	1	1.19566	TAG	438
TAG50:2-FA14:0	0.0518667	0.221189	1	1.16569	TAG	439
TAG53:1-FA18:1	0.0528132	0.162695	1	1.11938	TAG	440
TAG53:5-FA18:1	0.0533037	0.0521238	1	1.03679	TAG	441
PC(20:0/18:3)	0.0538338	0.0156596	1	1.01091	PC	442
PC(20:0/22:4)	0.0538338	0.00754124	1	1.00524	PC	443
TAG54:5-FA20:3	0.0541338	0.240488	1	1.18139	TAG	444
TAG52:1-FA16:0	0.0542328	0.20331	1	1.15134	TAG	445
TAG56:5-FA22:5	0.054471	0.196336	1	1.14578	TAG	446
TAG50:4-FA14:1	0.0544821	0.287697	1	1.22069	TAG	447
PC(16:0/18:4)	0.0545733	0.0239279	1	1.01672	PC	448
TAG48:3-FA18:2	0.054785	0.212167	1	1.15843	TAG	449
PC(20:0/22:6)	0.0548018	0.0225339	1	1.01574	PC	450
TAG51:3-FA15:0	0.0555993	0.289768	1	1.22244	TAG	451
PE(17:0/18:2)	0.0559348	0.107411	1	1.07729	PE	452
PC(17:0/18:1)	0.0564532	0.120121	1	1.08683	PC	453
DAG(18:1/18:2)	0.0581204	0.266626	1	1.20299	DAG	454
TAG56:6-FA22:5	0.0587719	0.196022	1	1.14554	TAG	455
PI(18:0/20:5)	0.060933	0.00595655	1	1.00414	PI	456
DAG(14:0/18:2)	0.0611671	0.155854	1	1.11408	DAG	457
TAG49:2-FA18:2	0.0618347	0.247633	1	1.18726	TAG	458
TAG46:1-FA16:1	0.0622404	0.364865	1	1.28776	TAG	459
PC(18:2/20:1)	0.0632112	0.0742955	1	1.05285	PC	460
MAG(18:0)	0.0636555	0.00125428	1	1.00087	MAG	461
PC(16:0/20:1)	0.0637594	0.104074	1	1.0748	PC	462
TAG53:6-FA18:3	0.064257	0.0605276	1	1.04285	TAG	463
TAG52:0-FA18:0	0.0643411	0.18004	1	1.13292	TAG	464
TAG53:3-FA17:0	0.0648035	0.248835	1	1.18825	TAG	465
TAG52:2-FA18:1	0.0654692	0.143738	1	1.10476	TAG	466
TAG52:0-FA16:0	0.0658138	0.177881	1	1.13122	TAG	467
TAG51:3-FA18:2	0.066972	0.25966	1	1.1972	TAG	468
PE(16:0/22:4)	0.0672315	0.236946	1	1.1785	PE	469
TAG50:1-FA16:1	0.0676507	0.21799	1	1.16311	TAG	470
TAG52:1-FA18:1	0.0677374	0.189181	1	1.14012	TAG	471
TAG56:5-FA20:3	0.0679143	0.176272	1	1.12996	TAG	472
TAG46:0-FA14:0	0.0686633	0.321402	1	1.24954	TAG	473
TAG49:2-FA16:0	0.0690734	0.228356	1	1.1715	TAG	474
TAG53:1-FA18:0	0.0698879	0.151425	1	1.11067	TAG	475
PE(P-16:0/22:4)	0.0701242	0.0992937	1	1.07125	PE	476
TAG46:0-FA16:0	0.0702571	0.309037	1	1.23888	TAG	477
TAG48:1-FA14:0	0.0707581	0.242423	1	1.18298	TAG	478
TAG56:4-FA20:4	0.0709461	0.175242	1	1.12915	TAG	479
MAG(22:6)	0.0717835	0.22713	1	1.1705	MAG	480
MAG(16:0)	0.0735739	0.00871888	1	1.00606	MAG	481
TAG52:2-FA16:0	0.0737673	0.163687	1	1.12015	TAG	482
TAG51:1-FA15:0	0.0746015	0.175182	1	1.12911	TAG	483
TAG50:1-FA14:0	0.0748305	0.182997	1	1.13524	TAG	484
TAG54:4-FA20:4	0.0751444	0.195619	1	1.14522	TAG	485
MAG(22:5)	0.0753454	0.151616	1	1.11081	MAG	486
TAG56:6-FA18:1	0.0772306	0.18156	1	1.13411	TAG	487
TAG56:6-FA16:0	0.0779597	0.22472	1	1.16855	TAG	488
TAG52:3-FA16:1	0.0802818	0.179868	1	1.13278	TAG	489
TAG51:3-FA17:0	0.0812497	0.22462	1	1.16847	TAG	490
TAG53:2-FA18:1	0.0817103	0.178838	1	1.13197	TAG	491
TAG46:1-FA14:1	0.0822678	0.33439	1	1.26084	TAG	492
PE(P-18:0/16:1)	0.0825292	0.00822391	1	1.00572	PE	493
TAG49:1-FA16:1	0.0838637	0.219546	1	1.16437	TAG	494
TAG54:0-FA18:0	0.0861712	0.141638	1	1.10316	TAG	495
PE(P-18:1/22:6)	0.0873029	0.0525139	1	1.03707	PE	496
DAG(18:1/22:5)	0.0875091	0.178971	1	1.13208	DAG	497
DAG(18:1/18:1)	0.0883328	0.132384	1	1.0961	DAG	498
TAG46:2-FA16:0	0.0896576	0.214939	1	1.16065	TAG	499
TAG51:2-FA17:0	0.089691	0.223555	1	1.16761	TAG	500
TAG52:7-FA16:0	0.0903909	0.130757	1	1.09487	TAG	501
PC(18:2/20:5)	0.090859	0.191248	1	1.14175	PC	502
TAG56:4-FA16:0	0.0916892	0.20785	1	1.15497	TAG	503
TAG48:3-FA18:1	0.091721	0.173445	1	1.12775	TAG	504
TAG48:3-FA16:1	0.0928582	0.241979	1	1.18261	TAG	505
MAG(20:5)	0.0934051	0.132106	1	1.09589	MAG	506
TAG46:1-FA14:0	0.0942261	0.247257	1	1.18695	TAG	507
TAG46:1-FA16:0	0.0948349	0.257622	1	1.19551	TAG	508
TAG50:1-FA18:0	0.0959771	0.226823	1	1.17026	TAG	509
TAG53:6-FA18:1	0.0967541	0.0442835	1	1.03117	TAG	510
DCER(20:0)	0.0973915	0.0680276	1	1.04828	DCER	511
HCER(26:0)	0.100651	0.0668315	1	1.04741	HCER	512
TAG50:3-FA14:1	0.101783	0.205669	1	1.15322	TAG	513
PC(20:0/20:5)	0.101836	0.0168942	1	1.01178	PC	514
PE(18:1/20:1)	0.101982	0.00452347	1	1.00314	PE	515
TAG51:0-FA16:0	0.103021	0.128154	1	1.09289	TAG	516
TAG48:4-FA14:1	0.103082	0.229868	1	1.17273	TAG	517
TAG47:1-FA16:0	0.103749	0.224826	1	1.16864	TAG	518
TAG52:4-FA20:3	0.10406	0.224446	1	1.16833	TAG	519
HCER(26:1)	0.104704	0.0915788	1	1.06554	HCER	520
TAG51:4-FA16:1	0.106167	0.206786	1	1.15411	TAG	521
TAG55:5-FA20:4	0.106323	0.170549	1	1.12549	TAG	522
TAG47:0-FA15:0	0.108501	0.244175	1	1.18442	TAG	523
TAG49:1-FA15:0	0.108762	0.238516	1	1.17978	TAG	524
PE(18:2/18:2)	0.108934	0.158666	1	1.11625	PE	525
PE(18:1/22:4)	0.10935	0.0667464	1	1.04735	PE	526
TAG51:2-FA15:0	0.110242	0.218525	1	1.16354	TAG	527
TAG51:1-FA16:0	0.110262	0.192517	1	1.14276	TAG	528
PE(18:1/20:2)	0.110593	0.0320049	1	1.02243	PE	529
TAG56:6-FA20:4	0.111081	0.173016	1	1.12741	TAG	530
TAG52:8-FA16:1	0.112089	0.168907	1	1.12421	TAG	531
DCER(24:1)	0.112735	0.0541514	1	1.03825	DCER	532
TAG50:2-FA14:1	0.113137	0.174462	1	1.12854	TAG	533
TAG54:4-FA20:3	0.115279	0.185219	1	1.13699	TAG	534
TAG48:3-FA14:1	0.115624	0.232966	1	1.17525	TAG	535
TAG48:2-FA16:1	0.116801	0.259443	1	1.19702	TAG	536
TAG48:0-FA14:0	0.118746	0.225377	1	1.16908	TAG	537
TAG47:2-FA14:0	0.119097	0.179236	1	1.13228	TAG	538
TAG50:2-FA18:1	0.119283	0.192816	1	1.14299	TAG	539
PC(18:1/18:2)	0.119471	0.097591	1	1.06999	PC	540
TAG48:1-FA18:1	0.119723	0.215059	1	1.16075	TAG	541
TAG49:2-FA14:0	0.11992	0.162301	1	1.11907	TAG	542
TAG50:4-FA20:3	0.120003	0.16559	1	1.12162	TAG	543
TAG48:3-FA12:0	0.121623	0.153807	1	1.1125	TAG	544
PC(16:0/16:1)	0.123178	0.16492	1	1.1211	PC	545
TAG54:6-FA20:4	0.123329	0.21927	1	1.16414	TAG	546
TAG58:8-FA20:4	0.12465	0.191729	1	1.14213	TAG	547
PE(P-18:0/22:5)	0.124746	0.11329	1	1.08169	PE	548
TAG54:7-FA20:4	0.127248	0.227313	1	1.17065	TAG	549
DAG(18:1/20:2)	0.127334	0.167163	1	1.12285	DAG	550
TAG54:3-FA20:3	0.12774	0.190238	1	1.14095	TAG	551
TAG50:3-FA16:1	0.128505	0.22541	1	1.16911	TAG	552
TAG51:1-FA17:0	0.131732	0.187774	1	1.139	TAG	553
TAG52:3-FA20:3	0.131744	0.273702	1	1.20891	TAG	554
TAG46:3-FA16:1	0.131907	0.207451	1	1.15465	TAG	555
TAG54:4-FA22:4	0.132218	0.267251	1	1.20351	TAG	556
TAG56:6-FA22:4	0.132331	0.239023	1	1.18019	TAG	557
TAG50:2-FA16:1	0.134793	0.20411	1	1.15198	TAG	558
MAG(20:0)	0.134817	0.0756422	1	1.05383	MAG	559
DAG(16:1/18:0)	0.13811	0.105373	1	1.07577	DAG	560
TAG50:3-FA20:3	0.139152	0.185676	1	1.13735	TAG	561
MAG(20:2)	0.139291	0.175811	1	1.1296	MAG	562
TAG46:3-FA12:0	0.139682	0.142465	1	1.10379	TAG	563
TAG52:4-FA20:4	0.140075	0.199584	1	1.14837	TAG	564
PC(16:0/16:0)	0.141152	0.0814122	1	1.05805	PC	565
TAG51:2-FA16:0	0.142186	0.188181	1	1.13933	TAG	566
TAG48:2-FA14:1	0.142452	0.233638	1	1.1758	TAG	567
DAG(16:0/16:1)	0.144307	0.183823	1	1.13589	DAG	568
DAG(16:0/20:3)	0.144383	0.172295	1	1.12685	DAG	569
TAG50:4-FA16:1	0.144718	0.22181	1	1.1662	TAG	570
TAG53:2-FA17:0	0.145792	0.159255	1	1.11671	TAG	571
TAG55:6-FA20:4	0.150309	0.155351	1	1.11369	TAG	572
PC(16:0/14:0)	0.150904	0.100216	1	1.07193	PC	573
PC(15:0/16:1)	0.155459	0.00353547	1	1.00245	PC	574
PE(18:0/20:2)	0.15577	0.135683	1	1.09861	PE	575
TAG50:4-FA20:4	0.15603	0.149587	1	1.10925	TAG	576
TAG48:1-FA14:1	0.158232	0.211277	1	1.15771	TAG	577
TAG58:10-FA20:4	0.158435	0.175749	1	1.12955	TAG	578
TAG53:1-FA17:0	0.158794	0.120981	1	1.08747	TAG	579
TAG46:2-FA16:1	0.161038	0.24546	1	1.18547	TAG	580
PC(14:0/14:0)	0.162271	0.030237	1	1.02118	PC	581
TAG55:8-FA20:4	0.162781	0.0264026	1	1.01847	TAG	582
PC(18:2/22:5)	0.16282	0.140462	1	1.10226	PC	583
TAG53:4-FA20:4	0.163408	0.15382	1	1.11251	TAG	584
TAG52:6-FA20:4	0.164428	0.183501	1	1.13564	TAG	585
TAG56:8-FA20:4	0.164509	0.234467	1	1.17647	TAG	586
PE(O-18:0/20:5)	0.165552	0.00780895	1	1.00543	PE	587
PI(18:0/20:2)	0.165861	0.0632347	1	1.04481	PI	588
TAG54:5-FA22:4	0.169365	0.212215	1	1.15847	TAG	589
TAG46:0-FA18:0	0.169853	0.140538	1	1.10232	TAG	590
TAG49:0-FA16:0	0.170494	0.218771	1	1.16374	TAG	591
TAG47:1-FA15:0	0.170736	0.226416	1	1.16992	TAG	592
DAG(18:2/22:4)	0.176882	0.167911	1	1.12343	DAG	593
MAG(20:3)	0.177245	0.279925	1	1.21413	MAG	594
MAG(18:3)	0.179637	0.560036	1	1.47431	MAG	595
PE(18:0/20:1)	0.181195	0.0330198	1	1.02315	PE	596
TAG60:10-FA22:5	0.182258	0.200607	1	1.14918	TAG	597
TAG49:2-FA17:0	0.182754	0.152693	1	1.11164	TAG	598
TAG49:2-FA18:1	0.183929	0.197919	1	1.14704	TAG	599
TAG49:1-FA14:0	0.184212	0.150568	1	1.11001	TAG	600
PC(14:0/18:3)	0.184459	0.0109921	1	1.00765	PC	601
TAG46:2-FA14:1	0.18493	0.250067	1	1.18926	TAG	602
TAG50:0-FA14:0	0.185786	0.150006	1	1.10957	TAG	603
TAG49:1-FA16:0	0.189264	0.211765	1	1.1581	TAG	604
TAG54:5-FA20:4	0.193044	0.159821	1	1.11715	TAG	605
PC(15:0/18:1)	0.193251	0.107463	1	1.07733	PC	606
TAG49:1-FA17:0	0.193423	0.190572	1	1.14122	TAG	607
PC(20:0/18:1)	0.197983	0.0544183	1	1.03844	PC	608
TAG51:2-FA18:1	0.200122	0.180067	1	1.13294	TAG	609
TAG49:3-FA16:1	0.200752	0.207785	1	1.15491	TAG	610
PE(O-18:0/16:0)	0.201448	0.00180367	1	1.00125	PE	611
TAG48:0-FA18:0	0.20275	0.188227	1	1.13936	TAG	612
TAG47:2-FA15:0	0.20604	0.175847	1	1.12963	TAG	613
TAG48:2-FA18:1	0.207749	0.180248	1	1.13308	TAG	614
PE(17:0/22:6)	0.208229	0.00580296	1	1.00403	PE	615
PI(18:1/18:1)	0.213955	0.102854	1	1.0739	PI	616
TAG51:1-FA18:0	0.218373	0.136342	1	1.09911	TAG	617
TAG44:0-FA18:0	0.221423	0.0813386	1	1.058	TAG	618
TAG56:4-FA22:4	0.221817	0.158184	1	1.11588	TAG	619
TAG55:7-FA20:4	0.224411	0.026948	1	1.01885	TAG	620
TAG51:1-FA18:1	0.225255	0.173479	1	1.12777	TAG	621
TAG49:1-FA18:1	0.226685	0.19813	1	1.14721	TAG	622
CER(18:0)	0.227875	0.125954	1	1.09123	CER	623
PE(18:1/22:0)	0.228244	0.00694997	1	1.00483	PE	624
TAG46:2-FA12:0	0.228491	0.151236	1	1.11052	TAG	625
CER(26:1)	0.229735	0.0671745	1	1.04766	CER	626
MAG(24:0)	0.229992	0.0387633	1	1.02723	MAG	627
TAG47:1-FA18:1	0.230865	0.150869	1	1.11024	TAG	628
TAG51:3-FA16:1	0.231155	0.160671	1	1.11781	TAG	629
TAG51:2-FA16:1	0.232674	0.165383	1	1.12146	TAG	630
PC(16:0/18:2)	0.233554	0.0698668	1	1.04962	PC	631
TAG49:0-FA17:0	0.235209	0.220737	1	1.16533	TAG	632
DAG(14:0/14:0)	0.235776	0.0174478	1	1.01217	DAG	633
DAG(14:0/16:0)	0.236497	0.124267	1	1.08995	DAG	634
DCER(22:0)	0.238187	0.0736008	1	1.05234	DCER	635
TAG47:0-FA16:0	0.238856	0.209519	1	1.1563	TAG	636
TAG56:7-FA20:4	0.239447	0.16731	1	1.12296	TAG	637
PC(18:0/22:6)	0.244511	0.0365414	1	1.02565	PC	638
TAG56:5-FA16:0	0.246503	0.17182	1	1.12648	TAG	639
TAG50:5-FA20:4	0.253112	0.146602	1	1.10696	TAG	640
PC(18:2/16:1)	0.259287	0.0916444	1	1.06558	PC	641
DAG(15:0/18:1)	0.261993	0.0754754	1	1.05371	DAG	642
LCER(20:0)	0.262782	0.00618087	1	1.00429	LCER	643
TAG56:5-FA22:4	0.270583	0.155688	1	1.11395	TAG	644
PE(18:2/16:1)	0.274205	0.0297895	1	1.02086	PE	645
TAG44:1-FA14:1	0.280116	0.17366	1	1.12792	TAG	646
TAG48:2-FA12:0	0.282945	0.0999984	1	1.07177	TAG	647
MAG(20:4)	0.286627	0.615424	1	1.53201	MAG	648
TAG48:1-FA18:0	0.287338	0.122774	1	1.08883	TAG	649
TAG51:0-FA18:0	0.28943	0.143446	1	1.10454	TAG	650
TAG45:0-FA16:0	0.291326	0.16603	1	1.12197	TAG	651
TAG49:2-FA16:1	0.29144	0.183962	1	1.136	TAG	652
PE(18:1/20:3)	0.291823	0.198202	1	1.14727	PE	653
TAG49:0-FA15:0	0.291992	0.185988	1	1.1376	TAG	654
PE(P-16:1/18:1)	0.295362	0.00217067	1	1.00151	PE	655
DAG(16:0/20:4)	0.295882	0.122116	1	1.08833	DAG	656
DAG(14:0/18:3)	0.297715	0.110396	1	1.07952	DAG	657
TAG46:1-FA12:0	0.298705	0.151077	1	1.1104	TAG	658
DAG(18:1/22:4)	0.299437	0.124296	1	1.08998	DAG	659
TAG51:0-FA17:0	0.306162	0.146813	1	1.10712	TAG	660
PC(18:1/20:4)	0.310856	0.0119353	1	1.00831	PC	661
TAG53:6-FA20:4	0.313993	0.150238	1	1.10975	TAG	662
TAG47:1-FA14:0	0.322257	0.16298	1	1.1196	TAG	663
PC(18:2/20:2)	0.323143	0.0819777	1	1.05847	PC	664
CER(20:1)	0.32657	0.0853817	1	1.06097	CER	665
PI(16:0/16:0)	0.326782	0.00815457	1	1.00567	PI	666
PC(18:0/22:5)	0.335998	0.0571992	1	1.04044	PC	667
TAG50:6-FA20:4	0.337968	0.0987014	1	1.07081	TAG	668
TAG52:5-FA20:4	0.343151	0.137272	1	1.09982	TAG	669
DAG(16:1/20:0)	0.345769	0.0447854	1	1.03153	DAG	670
MAG(22:4)	0.347312	0.101979	1	1.07324	MAG	671
TAG58:8-FA20:3	0.351509	0.146372	1	1.10678	TAG	672
TAG47:2-FA16:1	0.373896	0.190753	1	1.14136	TAG	673
MAG(18:2)	0.377935	0.870633	1	1.82847	MAG	674
TAG46:3-FA14:1	0.378089	0.167585	1	1.12318	TAG	675
DAG(18:2/20:4)	0.378504	0.165046	1	1.1212	DAG	676
PC(18:1/22:5)	0.379563	0.092502	1	1.06622	PC	677
PI(18:1/16:1)	0.383597	0.00552193	1	1.00383	PI	678
PE(O-18:0/20:4)	0.386417	0.0236616	1	1.01654	PE	679
TAG48:2-FA18:0	0.389493	0.0726631	1	1.05166	TAG	680
PE(P-18:1/16:0)	0.390331	0.0105093	1	1.00731	PE	681
TAG55:7-FA20:3	0.390541	0.0260791	1	1.01824	TAG	682
TAG47:0-FA14:0	0.390676	0.130478	1	1.09466	TAG	683
TAG49:0-FA18:0	0.391775	0.141532	1	1.10308	TAG	684
PC(18:2/22:6)	0.392611	0.00361639	1	1.00251	PC	685
DAG(14:1/18:1)	0.399405	0.0818443	1	1.05837	DAG	686
DAG(18:2/20:3)	0.407217	0.147175	1	1.1074	DAG	687
PC(14:0/20:5)	0.41736	0.00559178	1	1.00388	PC	688
PE(17:0/18:1)	0.41736	0.00704873	1	1.0049	PE	689
PE(P-18:2/18:2)	0.41736	0.00283969	1	1.00197	PE	690
DAG(16:1/18:2)	0.419991	0.13286	1	1.09647	DAG	691
PE(17:0/20:2)	0.421944	0.0044327	1	1.00308	PE	692
PI(18:0/16:0)	0.421944	0.0158685	1	1.01106	PI	693
DCER(26:1)	0.424814	0.0334997	1	1.02349	DCER	694
PC(20:0/20:2)	0.437393	0.0147455	1	1.01027	PC	695
PI(18:1/20:4)	0.447582	0.0233634	1	1.01633	PI	696
DAG(12:0/18:2)	0.45076	0.0519185	1	1.03664	DAG	697
CER(18:1)	0.468237	0.0565341	1	1.03996	CER	698
PE(P-18:1/22:4)	0.474334	0.0713883	1	1.05073	PE	699
TAG57:9-FA22:6	0.479724	0.0163353	1	1.01139	TAG	700
PC(17:0/16:1)	0.485636	0.0194252	1	1.01356	PC	701
DAG(14:0/18:1)	0.487769	0.0677661	1	1.04809	DAG	702
PE(18:2/20:4)	0.491721	0.0799363	1	1.05697	PE	703
MAG(18:1)	0.500366	0.634157	1	1.55203	MAG	704
DAG(18:1/20:4)	0.505146	0.114457	1	1.08257	DAG	705
PE(P-18:1/18:2)	0.505325	0.00278163	1	1.00193	PE	706
HCER(14:0)	0.506288	0.0511612	1	1.0361	HCER	707
PC(18:1/20:2)	0.508495	0.0603956	1	1.04275	PC	708
PC(20:0/18:2)	0.519587	0.0665332	1	1.0472	PC	709
TAG44:0-FA14:0	0.531169	0.153203	1	1.11204	TAG	710
TAG45:0-FA15:0	0.532815	0.174596	1	1.12865	TAG	711
PI(18:1/18:2)	0.533174	0.0254044	1	1.01776	PI	712
TAG51:4-FA20:4	0.53761	0.107151	1	1.0771	TAG	713
TAG53:5-FA20:4	0.542658	0.106073	1	1.07629	TAG	714
TAG47:1-FA17:0	0.549423	0.0846947	1	1.06046	TAG	715
PC(20:0/22:5)	0.56235	0.0273624	1	1.01915	PC	716
PI(16:0/16:1)	0.562583	0.00352938	1	1.00245	PI	717
DAG(18:1/20:3)	0.56276	0.108583	1	1.07817	DAG	718
PE(18:1/22:5)	0.563122	0.171134	1	1.12594	PE	719
PC(14:0/18:2)	0.574792	0.0723619	1	1.05144	PC	720
PI(16:0/18:1)	0.575845	0.0293091	1	1.02052	PI	721
MAG(17:0)	0.582367	0.000945055	1	1.00066	MAG	722
TAG55:6-FA20:3	0.590991	0.0166518	1	1.01161	TAG	723
TAG44:0-FA12:0	0.602056	0.117729	1	1.08503	TAG	724
PE(P-16:0/22:5)	0.606977	0.0263819	1	1.01845	PE	725
CE(20:0)	0.611308	0.00427063	1	1.00296	CE	726
TAG48:1-FA12:0	0.616594	0.0436325	1	1.03071	TAG	727
PI(18:0/18:2)	0.6192	0.0484581	1	1.03416	PI	728
TAG45:1-FA15:0	0.623707	0.100486	1	1.07213	TAG	729
DCER(26:0)	0.633363	0.0733365	1	1.05215	DCER	730
DAG(16:1/18:1)	0.634718	0.0769909	1	1.05482	DAG	731
PI(16:0/18:2)	0.642735	0.0534941	1	1.03778	PI	732
MAG(22:1)	0.654419	0.00511318	1	1.00355	MAG	733
DCER(22:2)	0.660292	0.0547346	1	1.03867	DCER	734
PC(14:0/22:5)	0.660876	0.00264308	1	1.00183	PC	735
PE(16:0/20:1)	0.67245	0.00975902	1	1.00679	PE	736
DAG(14:1/16:0)	0.672727	0.107502	1	1.07736	DAG	737
DAG(14:0/16:1)	0.673122	0.0536348	1	1.03788	DAG	738
DAG(16:1/20:4)	0.686144	0.0547039	1	1.03865	DAG	739
DAG(12:0/16:0)	0.692365	0.0502752	1	1.03546	DAG	740
TAG46:0-FA12:0	0.692705	0.0739891	1	1.05262	TAG	741
PE(P-18:1/22:5)	0.693107	0.0236177	1	1.01651	PE	742
PC(15:0/18:2)	0.697838	0.0806943	1	1.05753	PC	743
TAG58:9-FA20:4	0.712181	0.115622	1	1.08344	TAG	744
DAG(16:1/16:1)	0.742805	0.0539345	1	1.03809	DAG	745
PC(18:0/20:2)	0.745588	0.0115493	1	1.00804	PC	746
PC(18:0/20:4)	0.747247	0.0571399	1	1.0404	PC	747
TAG47:0-FA17:0	0.748081	0.106597	1	1.07669	TAG	748
PE(17:0/20:4)	0.753467	0.00892553	1	1.00621	PE	749
TAG44:1-FA14:0	0.755832	0.0869276	1	1.06211	TAG	750
PC(14:0/22:6)	0.765763	0.00659799	1	1.00458	PC	751
LPE(18:0)	0.767516	0.0140489	1	1.00979	LPE	752
CE(22:1)	0.785898	0.0127069	1	1.00885	CE	753
DCER(18:1)	0.786001	0.029577	1	1.02071	DCER	754
CE(18:4)	0.786115	0.0325953	1	1.02285	CE	755
CER(24:0)	0.792122	0.0310661	1	1.02177	CER	756
DAG(16:1/18:3)	0.79302	0.101021	1	1.07253	DAG	757
DCER(22:1)	0.814966	0.0140765	1	1.0098	DCER	758
PI(18:0/22:6)	0.817268	0.0309078	1	1.02165	PI	759
TAG44:1-FA12:0	0.818367	0.0959608	1	1.06878	TAG	760
LCER(14:0)	0.820044	0.0422661	1	1.02973	LCER	761
PC(17:0/18:2)	0.827965	0.0478439	1	1.03372	PC	762
PI(16:0/20:4)	0.853295	0.0187327	1	1.01307	PI	763
DAG(12:0/18:1)	0.855123	0.0201079	1	1.01404	DAG	764
PI(18:0/18:1)	0.873598	0.00915875	1	1.00637	PI	765
PC(20:0/20:3)	0.884232	0.0407549	1	1.02865	PC	766
PC(18:1/22:6)	0.893561	0.0115018	1	1.008	PC	767
PI(18:0/22:4)	0.908618	0.0309504	1	1.02168	PI	768
PI(16:0/20:3)	0.909597	0.0618463	1	1.0438	PI	769
PC(18:1/22:4)	0.910683	0.0358909	1	1.02519	PC	770
PC(17:0/22:5)	0.913855	0.0306737	1	1.02149	PC	771
TAG42:0-FA14:0	0.916167	0.0344361	1	1.02416	TAG	772
TAG45:0-FA14:0	0.925262	0.107695	1	1.07751	TAG	773
HCER(20:1)	0.925554	0.0180109	1	1.01256	HCER	774
MAG(24:1)	0.930639	0.0365937	1	1.02569	MAG	775
LPE(20:5)	0.931202	0.000841067	1	1.00058	LPE	776
DCER(20:1)	0.938378	0.015826	1	1.01103	DCER	777
MAG(16:1)	0.942669	0.181436	1	1.13401	MAG	778
PC(14:0/16:1)	0.962498	0.0535282	1	1.0378	PC	779
PC(20:0/22:2)	0.966971	0.0182537	1	1.01273	PC	780
DAG(14:0/20:4)	0.976675	0.0573346	1	1.04054	DAG	781
MAG(22:2)	0.990326	0.00854556	1	1.00594	MAG	782
CER(14:0)	0.990963	0.0288435	1	1.02019	CER	783
PC(18:1/20:1)	0.996643	0.00537806	1	1.00373	PC	784
PC(12:0/18:1)	0.999982	0.00212095	1	1.00147	PC	785
PC(18:2/22:4)	0.999999	0.0342756	1	1.02404	PC	786
PC(18:0/22:1)	1	0.0171148	1	1.01193	PC	787
PC(16:0/22:1)	1	0.0122244	1	1.00851	PC	788
PI(16:0/22:4)	1	0.0120052	1	1.00836	PI	789
PC(17:0/22:4)	1	0.0066291	1	1.00461	PC	790
PC(18:0/22:2)	1	0.00661174	1	1.00459	PC	791
PE(O-18:0/18:0)	1	0.00620613	1	1.00431	PE	792
PC(20:0/18:4)	1	0.00568572	1	1.00395	PC	793
PC(18:2/22:1)	1	0.00566575	1	1.00393	PC	794
PC(16:0/22:2)	1	0.00446215	1	1.0031	PC	795
PC(20:0/16:1)	1	0.00216073	1	1.0015	PC	796
PE(P-16:0/18:0)	1	0.00205911	1	1.00143	PE	797
PC(17:0/18:3)	1	0.00193921	1	1.00135	PC	798
PC(20:0/20:1)	1	0.00118921	1	1.00082	PC	799
PE(O-18:0/18:3)	1	0.00110589	1	1.00077	PE	800
PI(16:0/22:6)	1	0.000559528	1	1.00039	PI	801
PC(18:1/22:1)	1	0.000263986	1	1.00018	PC	802
PE(O-18:0/16:1)	1	0.00019457	1	1.00013	PE	803
PC(18:1/22:2)	1	8.91559e-05	1	1.00006	PC	804

## Sheet: Table S4
Table S4 Characteristics of the patients surviving at 72h after admission by LRS group
Variables	LRS-Low	LRS-Med	LRS-High	p-value
	(N=48)	(N=47)	(N=47)
Demographics
Age (Median [IQR])	50 (± 40)	43 (± 41)	46 (± 22)	0.341
Sex (% Male)	37 (77.1%)	36 (76.6%)	36 (76.6%)	0.998
Race (% White)	43 (89.6%)	42 (89.4%)	39 (83.0%)	0.549
Injury characteristics
ISS (Median [IQR])	22 (± 15)	29 (± 17)	30 (± 14)	0.004
Head AIS (Median [IQR])	2.0 (± 3.0)	3.0 (± 4.0)	3.0 (± 2.0)	0.17
TBI (%)	24 (50.0%)	26 (55.3%)	30 (63.8%)	0.391
GCS (Median [IQR])	12 (± 11)	4.0 (± 12)	3.0 (± 9.0)	0.118
SBP<70mmHg (%)	30 (62.5%)	17 (36.2%)	13 (27.7%)	0.002
HR (Median [IQR])	110 (± 27)	120 (± 17)	120 (± 21)	0.006
Injury type (% Blunt)	39 (81.3%)	43 (91.5%)	41 (87.2%)	0.637
Prehospital
Treatment arm
Standard care (%)	22 (45.8%)	28 (59.6%)	23 (48.9%)	0.374
FFP (%)	26 (54.2%)	19 (40.4%)	24 (51.1%)
Transport time (Median [IQR])	38 (± 17)	45 (± 27)	43 (± 15)	0.426
CPR (%)	0 (0%)	1 (2.13%)	2 (4.26%)	0.354
Intubation (%)	20 (41.7%)	29 (61.7%)	29 (61.7%)	0.076
Blood (%)	9 (18.8%)	17 (36.2%)	17 (36.2%)	0.102
Crystalloid (Median [IQR])	530 (± 1000)	1000 (± 1600)	1000 (± 1400)	0.196
PRBC (Median [IQR])	0 (± 0)	0 (± 2.0)	0 (± 1.0)	0.075
Hospital
Transfusion 24h (Median [IQR])	2.0 (± 8.3)	6.0 (± 10)	9.0 (± 20)	0.002
PRBC 24h (Median [IQR])	2.0 (± 5.0)	4.0 (± 5.0)	5.0 (± 8.0)	0.003
Plasma 24h (Median [IQR])	0 (± 2.0)	0 (± 4.0)	2.0 (± 6.5)	0.025
Platelets 24h (Median [IQR])	0 (± 0.25)	0 (± 1.0)	0 (± 1.5)	0.144
Crystalloid 24h (Median [IQR])	4400 (± 3600)	5500 (± 2900)	5000 (± 5200)	0.081
Vasopressors 24h (%)	29 (60.4%)	27 (57.4%)	31 (66.0%)	0.691
INR (Median [IQR])	1.2 (± 0.20)	1.3 (± 0.39)	1.3 (± 0.21)	0.025
Outcome
Coagulopathy (%)	24 (50.0%)	25 (53.2%)	21 (44.7%)	0.706
ALI (%)	14 (29.2%)	20 (42.6%)	15 (31.9%)	0.351
NI (%)	11 (22.9%)	13 (27.7%)	22 (46.8%)	0.032
MOF (%)	38 (79.2%)	45 (95.7%)	46 (97.9%)	0.002
Vent days (Median [IQR])	3.5 (± 7.3)	7.0 (± 11)	10 (± 8.0)	<0.001
ICU LOS (Median [IQR])	6.0 (± 7.3)	9.0 (± 11)	13 (± 9.0)	<0.001
Hospital LOS (Median [IQR])	10 (± 18)	16 (± 16)	21 (± 15)	0.004
Outcome group
Resolving	25 (52.1%)	13 (27.7%)	3 (6.38%)	<0.001
Non-resolving	23 (47.9%)	34 (72.3%)	44 (93.6%)
Pearson’s χ2 test was used for calculating p value of categorical variables. Kruskal-Wallis test was used for calculating p value of continuous variables.
LRS, Lipid reprogramming score; ISS, injury severity score; AIS, abbreviated injury score; TBI, traumatic brain injury; GCS, Glasgow coma score; SBP, systolic blood pressure;
FFP, fresh frozen plasma; CPR, cardiopulmonary resuscitation; PRBC, packed red blood cells; INR, international normalized ratio; ALI, acute lung injury; NI, nosocomial infection ;
MOF, multiple organ failure; ICU, intensive care unit; LOS, length of stay.
